# Supplementary material for: The effect of an interactive cycling training on cognitive functioning in older adults with mild dementia: study protocol for a randomized controlled trial
Source: PubMed Central journal article supplement (PMC5361710; doi:10.1186/s12877-017-0464-x), 2017-03-21

**Additional file 1.** Bicycle set-up

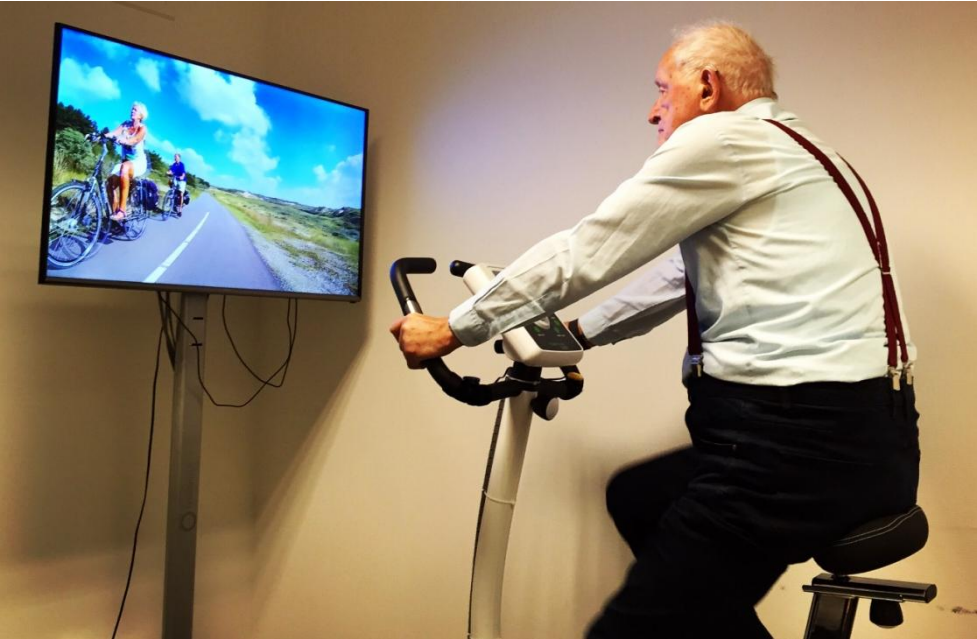

Supplement: 12877_2017_464_MOESM1_ESM.pdf [file 12877_2017_464_MOESM1_ESM.pdf]
